# Supplementary material
Source: MDPI journal article supplement (https://www.mdpi.com/2076-3417/12/24/13010)
Supplement: s1 [file s1]

**Supplementary Table S1. Physico-chemical Property Solubility of fucoidan from *S. illicifolium* in different solvents**

| S.NO | Solvent             | Solubility |
|------|---------------------|------------|
| 1.   | Hexane              | Insoluble  |
| 2.   | Chloroform          | Insoluble  |
| 3.   | Ethyl acetate       | Insoluble  |
| 4.   | Acetone             | Insoluble  |
| 5.   | Dimethyl sulphoxide | Insoluble  |
| 6.   | Dimethyl formamide  | Insoluble  |
| 7.   | Methanol            | Insoluble  |
| 8.   | Ethanol             | Insoluble  |
| 9.   | Water               | Soluble    |
| 10.  | 0.1 M HCl           | Soluble    |

**Supplementary Table S2. Anticancer activity of Fucoidan from *Sargassum ilicifolium***

| S.No | Concentrations<br>µg/mL | % Cell<br>Inhibition |
|------|-------------------------|----------------------|
| 1.   | 5                       | 98.14                |
| 2.   | 10                      | 91.50                |
| 3.   | 20                      | 83.26                |
| 4.   | 30                      | 79.41                |
| 5.   | 40                      | 73.43                |
| 6.   | 50                      | 57.50                |
| 7.   | 60                      | 49.80                |
| 8.   | 80                      | 33.73                |
| 9.   | 100                     | 26.29                |

**Supplementary Table S3.** The molecular docking experiment was carried out for the compound fucoidan against the target protein of antioxidant and anticancer studies. Their molecular interaction, bond length with glide scores were listed.

| Protein Name                               | Protein ID (PDB) | Amino acid interaction (3-letter code)                 | Bond Length                                                                            | Glide Score Kcal/mol | Glide Energy Kcal/mol |
|--------------------------------------------|------------------|--------------------------------------------------------|----------------------------------------------------------------------------------------|----------------------|-----------------------|
| Anti-oxidant                               |                  |                                                        |                                                                                        |                      |                       |
| NADPH oxidase                              | 1DNU             | ASN162(D), ASN162(C), ARG323 (C).                      | 1.99, 2.03, (1.74, 2.65, 2.18)                                                         | -7.169               | -23.864               |
| Cytochrome p450                            | 1OG5             | GLU400(C), LYS423(B), LYS421(B), PHE419(A), LYS421(A). | (2.08, 2.39), 1.98, 2.35, (2.28, 2.33), (1.57, 1.97, 2.03).                            | -4.455               | -25.778               |
| Xanthine dehydrogenase/oxidase             | 3NRZ             | LYS754, GLU761, TYR599, ILE596, PHE763                 | 2.11, (2.36, 2.54), (1.60, 2.22, 2.17, 2.70, 2.19,2.0), 2.81, (2.17, 2.98, 2.40, 2.60) | -4.899               | -12.708               |
| Anti-cancer                                |                  |                                                        |                                                                                        |                      |                       |
| Caspase-3                                  | 1I3O             | ARG286                                                 | (1.66, 2.66)                                                                           | -5.062               | -23.071               |
| Nuclear factor NF-kappa-B p105 subunitS    | 1SVC             | GLN53, ARG54, TYR241,                                  | 2.21, (1.74, 2.40), (3.43, 1.87, 3.14)                                                 | -3.219               | -14.008               |
| cellular tumor antigen p53                 | 6XRE             | HIS115, THR125, CYS124                                 | (3.11, 2.18), 1.57, 1.97                                                               | -6.205               | -36.567               |
| Mucosal addressin cell adhesion molecule 1 | 1BQS             | LEU17, TYR90, PHE92                                    | 2.76, 3.21, 2.09                                                                       | -4.222               | -21.957               |
